# Supplementary material for: High-risk blastemal Wilms tumor can be modeled by 3D spheroid cultures in vitro
Source: PubMed Central journal article supplement (PMC6976522; doi:10.1038/s41388-019-1027-8), 2019-09-27
Supplement: 41388_2019_1027_MOESM2_ESM.pdf [file 41388_2019_1027_MOESM2_ESM.pdf]

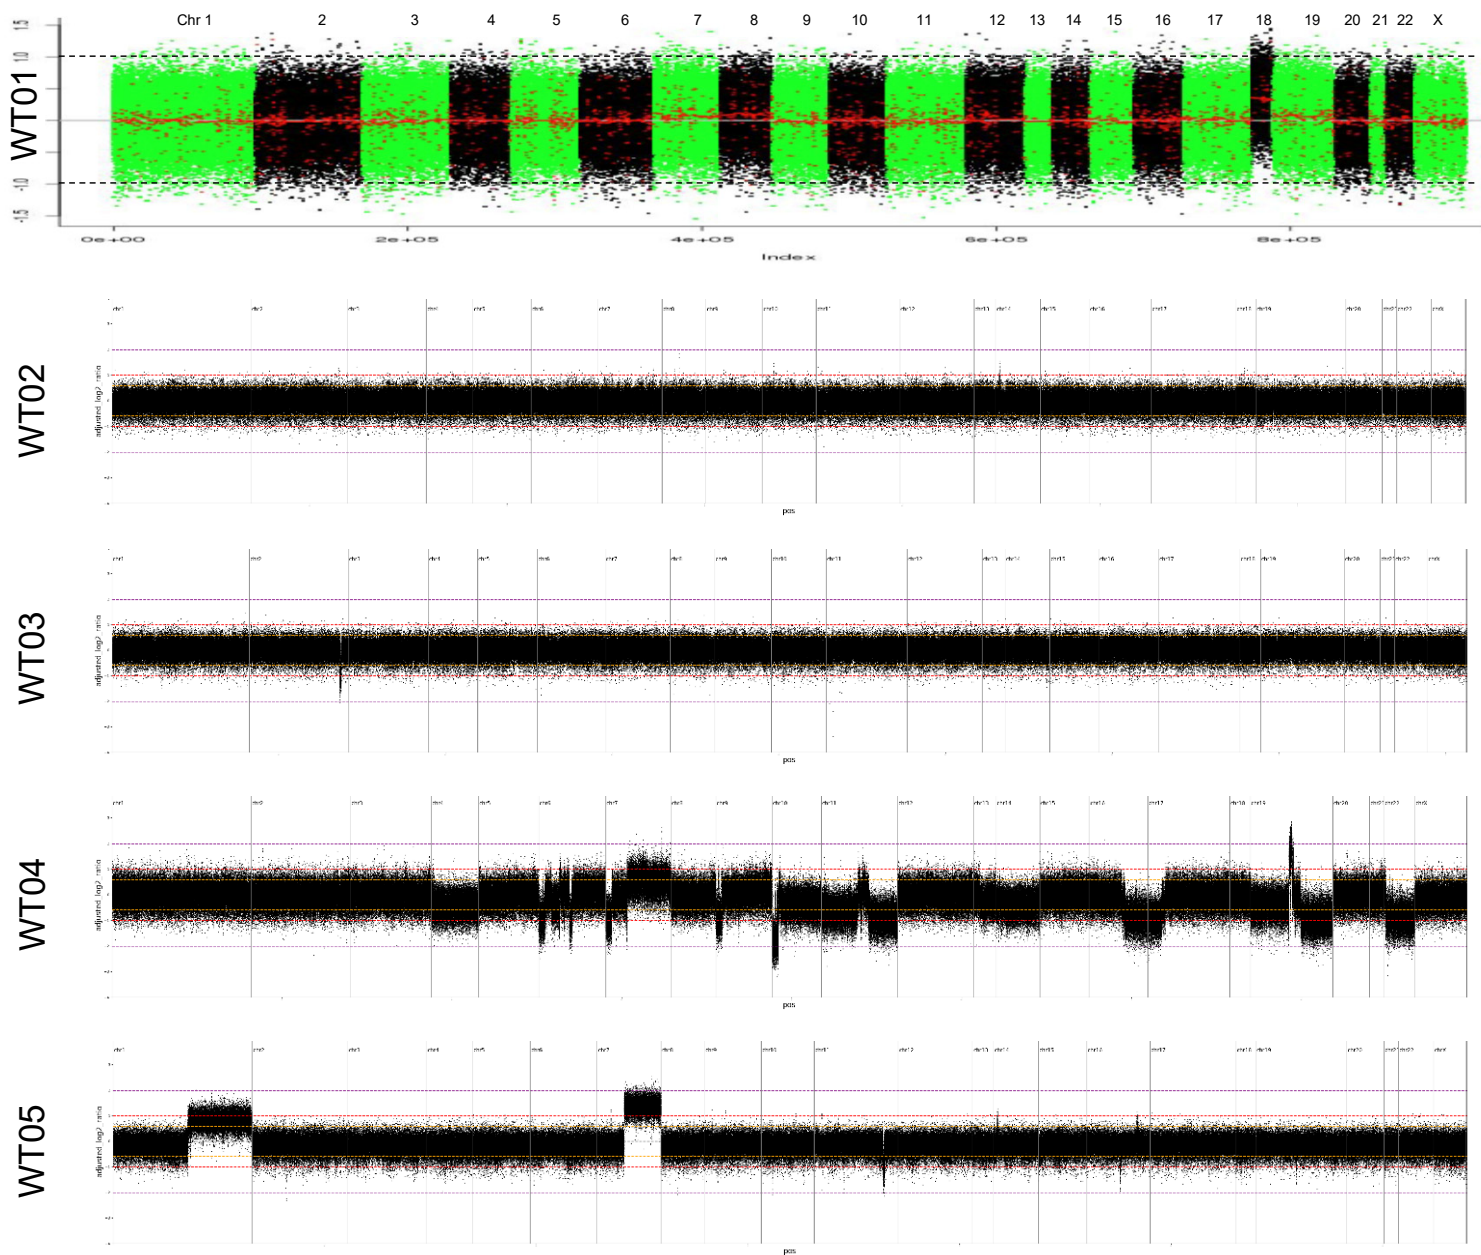

**Fig. S1: Somatic CNV of primary tumor material based on WES data.**

CNVs were determined by tumor to control comparison of WES reads using Varscan2. Each graph represents the adjusted log<sub>2</sub> ratio along the genome and chromosome numbers are given above. Gains appear as values above 1, losses as values below -1. WT01 was analyzed and described previously [7].
